# Supplementary material for: Synergistic effects of Bifidobacterium thermophilum RBL67 and selected prebiotics on inhibition of Salmonella colonization in the swine proximal colon PolyFermS model
Source: PubMed Central journal article supplement (PMC4215022; doi:10.1186/s13099-014-0044-y), 2014-10-24
Supplement: 13099_2014_44_MOESM3_ESM.pdf [file 13099_2014_44_MOESM3_ESM.pdf]

**Table S1. Primers and probes used for detection of bacterial target groups with qPCR**

| Target                                                                  | Primer/Probe                          | Sequence 5'-3'                                                                               | Reference |
|-------------------------------------------------------------------------|---------------------------------------|----------------------------------------------------------------------------------------------|-----------|
| total 16S rRNA genes                                                    | Eub338F<br>Eub518R                    | ACT CCT ACG GGA GGC AGC AG<br>ATT ACC GCG GCT GCT GG                                         | [1]       |
| <i>Bifidobacterium</i> spp.                                             | xfp-fw<br>xfp-rv                      | ATC TTC GGA CCB GAY GAG AC<br>CGA TVA CGT GVA CGA AGG AC                                     | [2]       |
| <i>Lactococcus</i> /<br><i>Pediococcus</i> /<br><i>Leuconostoc</i> spp. | F_Lacto 05<br>R_Lacto 04              | AGC AGT AGG GAA TCT TCC A<br>CGC CAC TGG TGT TCY TCC ATA TA                                  | [3]       |
| <i>Bacteroides-Prevotella</i>                                           | Bac303F<br>Bfr-Femrev                 | GAA GGT CCC CCACAT TG<br>CGC KAC TTG GCT GGT TCA G                                           | [4]       |
| <i>Enterobacteriaceae</i>                                               | Eco1457F<br>Eco1652R                  | CAT TGA CGT TAC CCG CAG AAG AAG C<br>CTC TAC GAG ACT CAA GCT TGC                             | [5]       |
| <i>Clostridium</i> Cluster IV                                           | Clep866mF<br>Clep1240mR               | TTA ACA CAA TAA GTW ATC CAC CTG G<br>ACC TTC CTC CGT TTT GTC AAC                             | [4]       |
| <i>Bifidobacterium</i><br><i>thermophilum</i>                           | btherm RTF<br>btherm RTR<br>bthermTqm | TTG CTT GCG GGT GAG AGT<br>CGC CAA CAA GCT GAT AGG AC<br>FAM-ATG TGC CGG GCT CCT GCA T-TAMRA | [6]       |

## References for Additional file 1: Table S1

1. Guo X, Xia X, Tang R, Zhou J, Zhao H, Wang K: **Development of a real-time PCR method for *Firmicutes* and *Bacteroidetes* in faeces and its application to quantify intestinal population of obese and lean pigs.** *Lett Appl Microbiol* 2008, **47**:367-373.
2. Cleusix V, Lacroix C, Dasen G, Leo M, Le Blay G: **Comparative study of a new quantitative real-time PCR targeting the xylulose-5-phosphate/fructose-6-phosphate phosphoketolase bifidobacterial gene (*xfp*) in faecal samples with two fluorescence *in situ* hybridization methods.** *J Appl Microbiol* 2010, **108**:181-193.
3. Furet JP, Firmesse O, Gourmelon M, Bridonneau C, Tap J, Mondot S, Dore J, Corthier G: **Comparative assessment of human and farm animal faecal microbiota using real-time quantitative PCR.** *FEMS Microbiol Ecol* 2009, **68**:351-362.
4. Ramirez-Farias C, Slezak K, Fuller Z, Duncan A, Holtrop G, Louis P: **Effect of inulin on the human gut microbiota: stimulation of *Bifidobacterium adolescentis* and *Faecalibacterium prausnitzii*.** *Br J Nutr* 2009, **101**:541-550.
5. Bartosch S, Fite A, Macfarlane GT, McMurdo ME: **Characterization of bacterial communities in feces from healthy elderly volunteers and hospitalized elderly patients by using real-time PCR and effects of antibiotic treatment on the fecal microbiota.** *Appl Environ Microbiol* 2004, **70**:3575-3581.
6. Mathys S, Lacroix C, Mini R, Meile L: **PCR and real-time PCR primers developed for detection and identification of *Bifidobacterium thermophilum* in faeces.** *BMC Microbiol* 2008, **8**:179.
